# Supplementary material for: Dynamic solid phase microextraction analysis for airborne methamphetamine: quantitation using isotopically substituted methamphetamine
Source: Royal Society of Chemistry journal article supplement (doi:10.1039/c3ay40536b), 2013-01-01
Supplement: c3ay40536b.pdf [file c3ay40536b.pdf]

## Electronic Supplementary Information

### Dynamic SPME sampler

A diagram of the dynamic SPME sampler is shown in Figure 1.

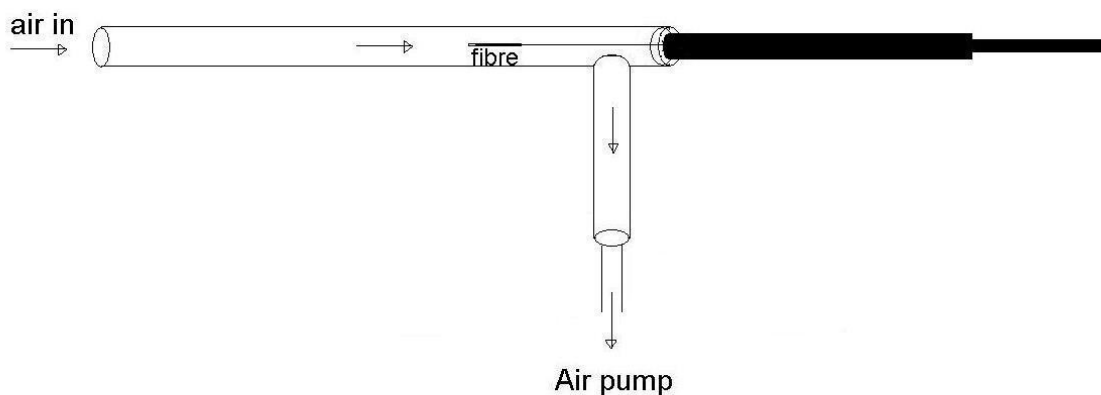

**Figure 1:** Diagram of the dynamic SPME sampler

The dynamic SPME sampler was constructed from Restek Silcosteel®-CR treated  $\frac{3}{8}$ " outer diameter 0.277" inner diameter, 316L grade stainless steel tube, with a side arm of the same material attached by drilling a hole with a diameter smaller than the inner diameter of the tube, shaping the sidearm connection to follow the curvature of the tube, then welding on the outside of the tube. A Supelco SPME fibre holder (Sigma Aldrich) was attached to the Silcosteel® tube by creating a thread on the outside of the SPME holder hub which could then be screwed into an adaptor plug inserted in the tubing. The dynamic field sampler was coupled to an SKC Model 224-PCXR4 air sampling pump using a push-fit connector and tube adapter with Tygon 2275  $\frac{1}{4}$ " inner diameter,  $\frac{3}{8}$ " outer diameter tubing. The air pump had a built-in rotameter and flow rate was confirmed independently using a TSI 4100 series flow meter. A flow dampener and Anasorb/Tenax 226-171 sorbent tube (SKC) were added to even out the flow rate and to protect the air sampling pump from contamination.
